# Supplementary material for: Characterization of the [3Fe–4S]0/1+cluster from the D14C variant of Pyrococcus furiosus ferredoxin via combined NRVS and DFT analyses
Source: Royal Society of Chemistry journal article supplement (doi:10.1039/c5dt04760a), 2016-01-01
Supplement: c5dt04760a1.zip [file c5dt04760a1.zip]

Animated Vibrational Modes as GIF Files for:

## Characterization of the [3Fe-4S]<sup>0/1+</sup> cluster from the D14C variant of *Pyrococcus furiosus* ferredoxin via combined NRVS and DFT analyses

Lars Lauterbach,<sup>\*a,b</sup> Leland B. Gee,<sup>a</sup> Vladimir Pelmentschikov,<sup>\*b</sup> Francis E. Jenney, Jr,<sup>c</sup> Saeed Kamali,<sup>a,d</sup> Yoshitaka Yoda,<sup>e</sup> Michael W. W. Adams<sup>f</sup> and Stephen P. Cramer<sup>a,g</sup>

---

<sup>a</sup> Department of Chemistry, University of California, Davis, CA 95616, USA

<sup>b</sup> Institut für Chemie, Technische Universität Berlin, 10623 Berlin, Germany

<sup>c</sup> Georgia Campus, Philadelphia College of Osteopathic Medicine, Suwanee, GA 30024, USA

<sup>d</sup> Department of Mechanical, Aerospace and Biomedical Engineering, University of Tennessee Space Institute, Tullahoma, TN 37388, USA

<sup>e</sup> JASRI, SPring-8, Sayo-gun, Hyogo 679-5198, Japan

<sup>f</sup> Department of Biochemistry & Molecular Biology, Life Sciences Building, University of Georgia, Athens, GA 30602, USA

<sup>g</sup> Physical Biosciences Division, Lawrence Berkeley National Laboratory, Berkeley, CA 94720, USA

\* Corresponding authors. E-mails: [lars.lauterbach@tu-berlin.de](mailto:lars.lauterbach@tu-berlin.de) ; [pelmentschikov@tu-berlin.de](mailto:pelmentschikov@tu-berlin.de)

---

**Pf-Fd-D14C\_3Fe-4S\_X\_YYY.YYcm-1.gif** file of this archive illustrates a *Pf* Fd D14C [3Fe-4S]<sup>x</sup> normal mode at YYY.YY cm<sup>-1</sup> animated following the present DFT calculations. The displayed orientation of the model corresponds to Fig. S2 of the ESI<sup>†</sup> document. The hydrogen atoms were omitted for clarity.
